# Supplementary material for: Screening for mouse genes lost in mammals with long lifespans
Source: BioData Min. 2019 Nov 9;12:20. doi: 10.1186/s13040-019-0208-x (PMC6842137; doi:10.1186/s13040-019-0208-x)
Supplement: Supplementary file 5 — Additional file 5: Table S2. Data table of genomes in Ensembl v95. Columns: A, scientific name; B, common name; C, assembly name; D, accession and version; E, genome total length; F, total length of the assembly gaps; G, gaps percentage; H, total number of scaffolds; I, scaffold N50; J, total number of protein-coding genes in the Ensembl database; K, number of genes that have at least two neighboring genes; L, percentage of protein-coding genes having two or more neighbors. [file 13040_2019_208_MOESM5_ESM.xlsx]

## Sheet: genomes
Scientific name	Common name	Ensembl Assembly	Accession	Total, bp	Total gaps	% gaps	# scaffolds	Scaffold N50	# genes	# genes (3+)	% genes 3+
Aotus nancymaae	Ma's night monkey	Anan_2.0	GCA_000952055.2	2861684817	147245327	0.0514541	28922	8268663	20412	20012	0.980404
Callithrix jacchus	Marmoset	ASM275486v1	GCA_002754865.1	2845375248	9511100	0.00334265	39944	129239660	19690	19498	0.990249
Carlito syrichta	Tarsier	Tarsius_syrichta-2.0.1	GCA_000164805.2	3453864774	48109210	0.0139291	337189	401181	18398	13568	0.737471
Cavia aperea	Brazilian guinea pig	CavAp1.0	GCA_000688575.1	2716396567	966117959	0.355662	3131	27928671	14218	14163	0.996132
Cavia porcellus	Guinea Pig	Cavpor3.0	GCA_000151735.1	2723219641	59849908	0.0219776	3144	27942054	18095	17994	0.994418
Cebus capucinus imitator	Capuchin	Cebus_imitator-1.0	GCA_001604975.1	2717703182	107184800	0.0394395	7156	5274112	20317	19946	0.981739
Cercocebus atys	Sooty mangabey	Caty_1.0	GCA_000955945.1	2848246356	60973502	0.0214074	11433	12849131	20926	20745	0.99135
Chinchilla lanigera	Long-tailed chinchilla	ChiLan1.0	GCA_000276665.1	2390868971	106575991	0.0445763	2839	21893125	17809	17724	0.995227
Chlorocebus sabaeus	Vervet-AGM	ChlSab1.1	GCA_000409795.2	2789656328	37637120	0.0134917	2022	81825804	19165	19082	0.995669
Colobus angolensis palliatus	Angola colobus	Cang.pa_1.0	GCA_000951035.1	2970124662	290151525	0.09769	13124	7840981	20617	20422	0.990542
Dipodomys ordii	Kangaroo rat	Dord_2.0	GCA_000151885.2	2236368823	171054776	0.0764877	65193	11931245	16911	16616	0.982556
Fukomys damarensis	Damara mole rat	DMR_v1.0	GCA_000743615.1	2333892479	47907697	0.020527	74730	5314287	17730	17370	0.979695
Gorilla gorilla gorilla	Gorilla	gorGor4	GCA_000151905.3	3063362794	145977342	0.0476526	40730	81227029	21794	21473	0.985271
Heterocephalus glaber	Naked mole-rat male	HetGla_1.0	GCA_000230445.1	2643978223	213913418	0.0809059	39267	1603177	20742	19302	0.930576
Heterocephalus glaber	Naked mole-rat female	HetGla_female_1.0	GCA_000247695.1	2618204639	303433536	0.115894	4229	20532749	20774	20648	0.993935
Homo sapiens	Human	GRCh38.p12	GCA_000001405.27	3257319537	161368351	0.0495402	874	59364414	24154	23157	0.958723
Ictidomys tridecemlineatus	Squirrel	SpeTri2.0	GCA_000236235.1	2478393770	167333470	0.0675169	12483	8192786	18474	18180	0.984086
Jaculus jaculus	Lesser Egyptian jerboa	JacJac1.0	GCA_000280705.1	2835250225	364982898	0.12873	10898	22080993	17845	17746	0.994452
Macaca fascicularis	Crab-eating macaque	Macaca_fascicularis_5.0	GCA_000364345.1	2946843737	142977039	0.0485187	7625	88649475	21584	21328	0.988139
Macaca mulatta	Macaque	Mmul_8.0.1	GCA_000772875.3	3236224332	94131158	0.0290867	286263	4193270	21099	20639	0.978198
Macaca nemestrina	Pig-tailed macaque	Mnem_1.0	GCA_000956065.1	2948703511	110216988	0.0373781	9733	15219753	21060	20917	0.99321
Mandrillus leucophaeus	Drill	Mleu.le_1.0	GCA_000951045.1	3061992840	340585301	0.11123	12821	3186748	20841	20222	0.970299
Mesocricetus auratus	Golden Hamster	MesAur1.0	GCA_000349665.1	2504925039	428748785	0.171162	21484	12753307	18257	17728	0.971025
Microcebus murinus	Mouse Lemur	Mmur_3.0	GCA_000165445.3	2487409138	101087183	0.0406395	7678	108171978	18895	18859	0.998095
Microtus ochrogaster	Prairie vole	MicOch1.0	GCA_000317375.1	2287340943	183019268	0.080014	6450	17270019	19130	19007	0.99357
Mus musculus	Mouse	GRCm38.p6	GCA_000001635.8	2730855475	78088216	0.0285948	162	54517951	22950	22916	0.998519
Nannospalax galili	Upper Galilee mountains blind mole rat	S.galili_v1.0	GCA_000622305.1	3061424619	147976214	0.0483357	154976	3618479	18647	18023	0.966536
Nomascus leucogenys	Gibbon	Nleu_3.0	GCA_000146795.3	2962060179	205468402	0.0693667	17524	52956880	20794	20471	0.984467
Octodon degus	Degu	OctDeg1.0	GCA_000260255.1	2995889303	469628236	0.156758	7135	12091372	19982	19818	0.991793
Oryctolagus cuniculus	Rabbit	OryCun2.0	GCA_000003625.1	2737462810	133467217	0.0487558	3318	35972871	19293	18473	0.957498
Otolemur garnettii	Bushbaby	OtoGar3	GCA_000181295.3	2519724550	160194097	0.063576	7793	13852661	19506	19279	0.988363
Pan paniscus	Bonobo	panpan1.1	GCA_000258655.2	3286643896	560706734	0.170602	10984	8197324	21210	20999	0.990052
Pan troglodytes	Chimpanzee	Pan_tro_3.0	GCA_000001515.5	3231154112	98551029	0.0305003	45510	26972556	23534	22976	0.97629
Papio anubis	Olive baboon	Panu_3.0	GCA_000264685.2	2959373024	22368085	0.00755839	71135	585721	21647	21232	0.980829
Peromyscus maniculatus bairdii	Northern American deer mouse	Pman_1.0	GCA_000500345.1	2630541020	157004576	0.0596853	30921	3760915	19854	19181	0.966103
Pongo abelii	Orangutan	PPYG2	-	3446771396	337423864	0.0978956			20424	20420	0.999804
Propithecus coquereli	Coquerel's sifaka	Pcoq_1.0	GCA_000956105.1	2798152141	714387603	0.255307	22539	5604909	17925	17636	0.983877
Rattus norvegicus	Rat	Rnor_6.0	GCA_000001895.4	2870184193	140198689	0.0488466	1395	14986627	22250	22144	0.995236
Rhinopithecus bieti	Black snub-nosed monkey	ASM169854v1	GCA_001698545.1	2977074946	175164476	0.0588378	105032	2225337	20966	19463	0.928313
Rhinopithecus roxellana	Golden snub-nosed monkey	Rrox_v1	GCA_000769185.1	2899552139	43508003	0.0150051	135512	1549224	21289	19602	0.920757
Saimiri boliviensis boliviensis	Bolivian squirrel monkey	SaiBol1.0	GCA_000235385.1	2608588537	131440969	0.0503878	2686	18744880	19380	19303	0.996027
